# Supplementary material for: Cause analysis of chatoyancy of sapphires from Shandong, China
Source: Royal Society of Chemistry journal article supplement (doi:10.1039/c9ra03585k), 2019-01-01
Supplement: c9ra03585k1.pdf [file c9ra03585k1.pdf]

**Supplementary Material for: Cause Analysis of Chatoyancy of  
Sapphire from Shandong, China**

Jiaqi Yu, Xuemei He \*, Zhiyun Lu

*School of Gemology, China University of Geosciences, Beijing 100083, China*

*\*Corresponding author:*

Xuemei He, E-mail: [hexuemei@cugb.edu.cn](mailto:hexuemei@cugb.edu.cn)

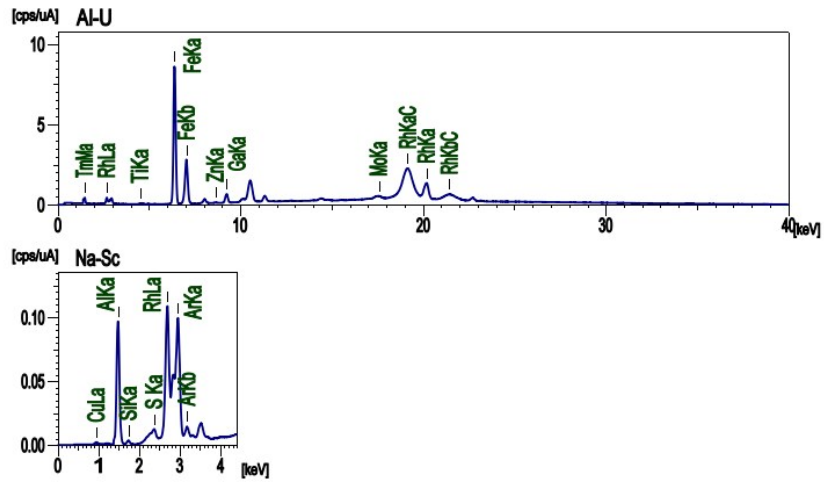

Figure S1 XRF spectrum of sample A2

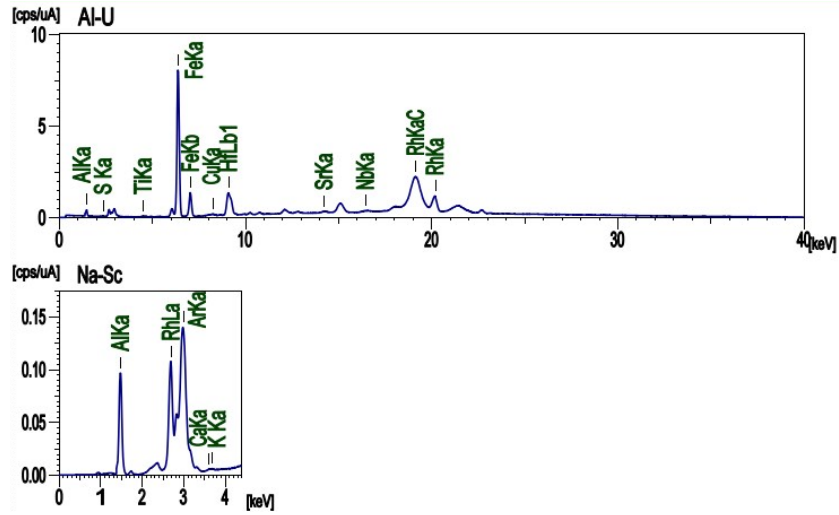

Figure S2 XRF spectrum of sample A3

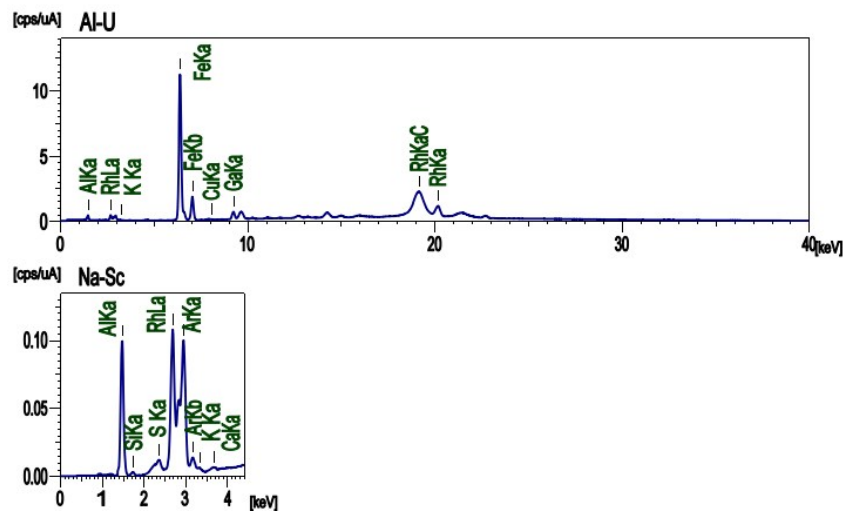

Figure S3 XRF spectrum of sample B1

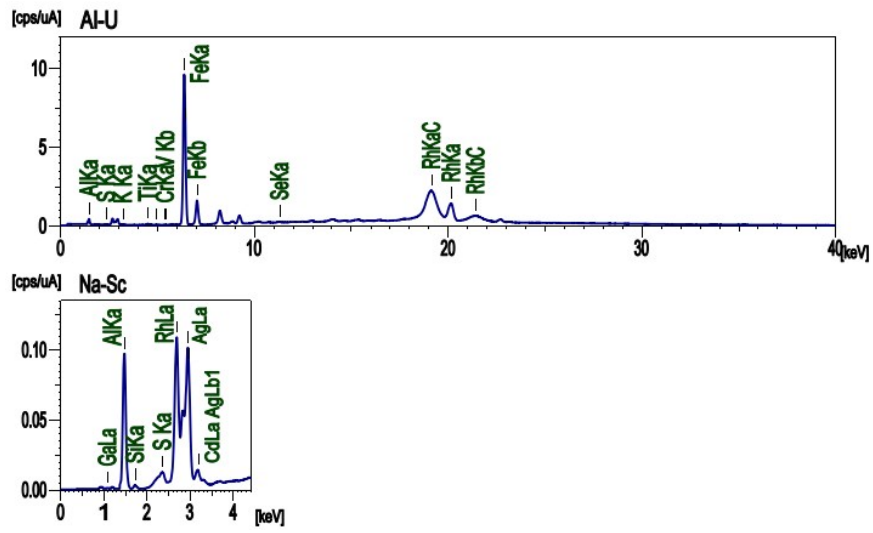

Figure S4 XRF spectrum of sample B2

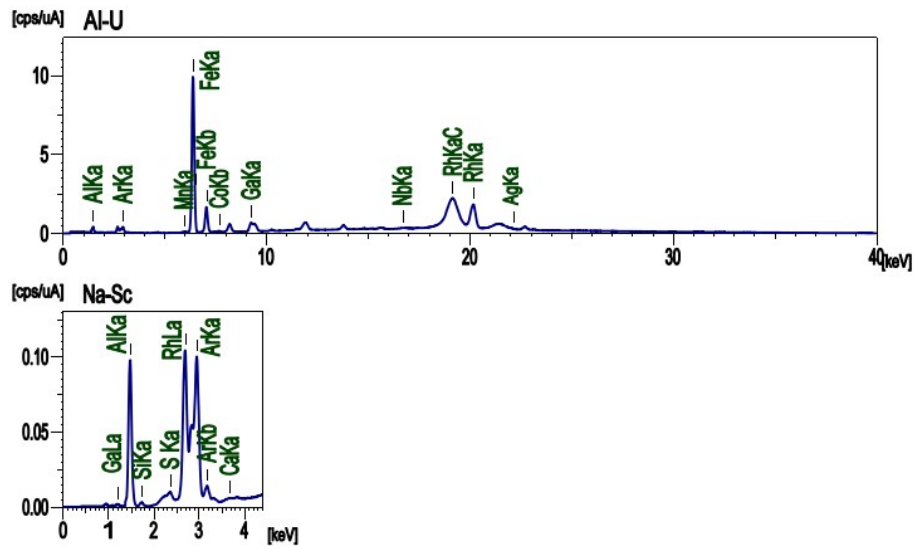

Figure S5 XRF spectrum of sample B3
